# Supplementary material for: Prognostic Relevance of Tumor-Infiltrating Immune Cells in Cervix Squamous Cell Carcinoma
Source: Preprints.org preprint supplement (doi:10.20944/preprints202307.1719.v1), 2023-07-25
Supplement: Supplementary file 1 [file supplementary]

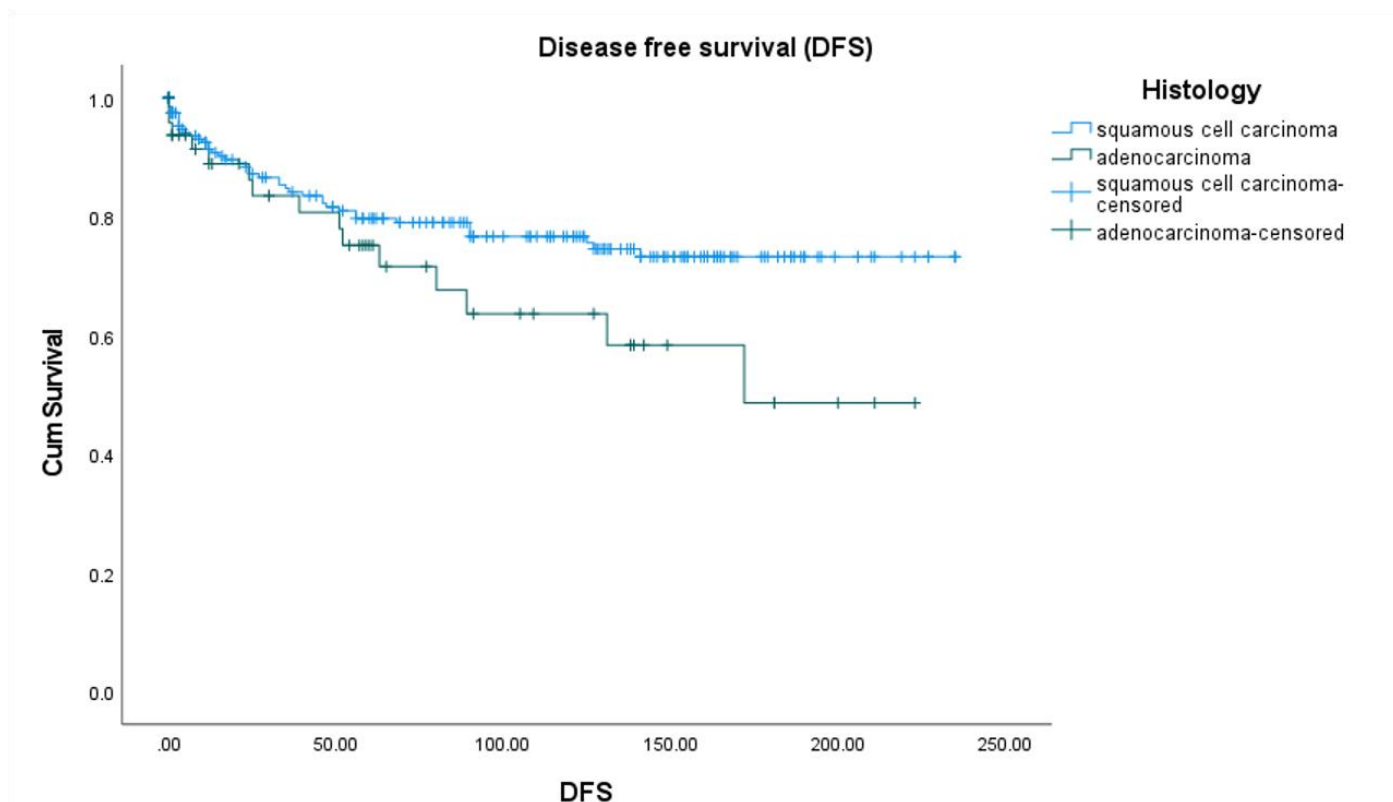

**Supplementary Figure 1:** Kaplan-Meier survival analyses for Disease free survival (DSF) in different histological subtypes of cervical cancer ( $p=0.088$ )

2

3

4

5

6

7

8

9

10

11

12

13

14

15

16

17

18

19

20

21

22

23

24

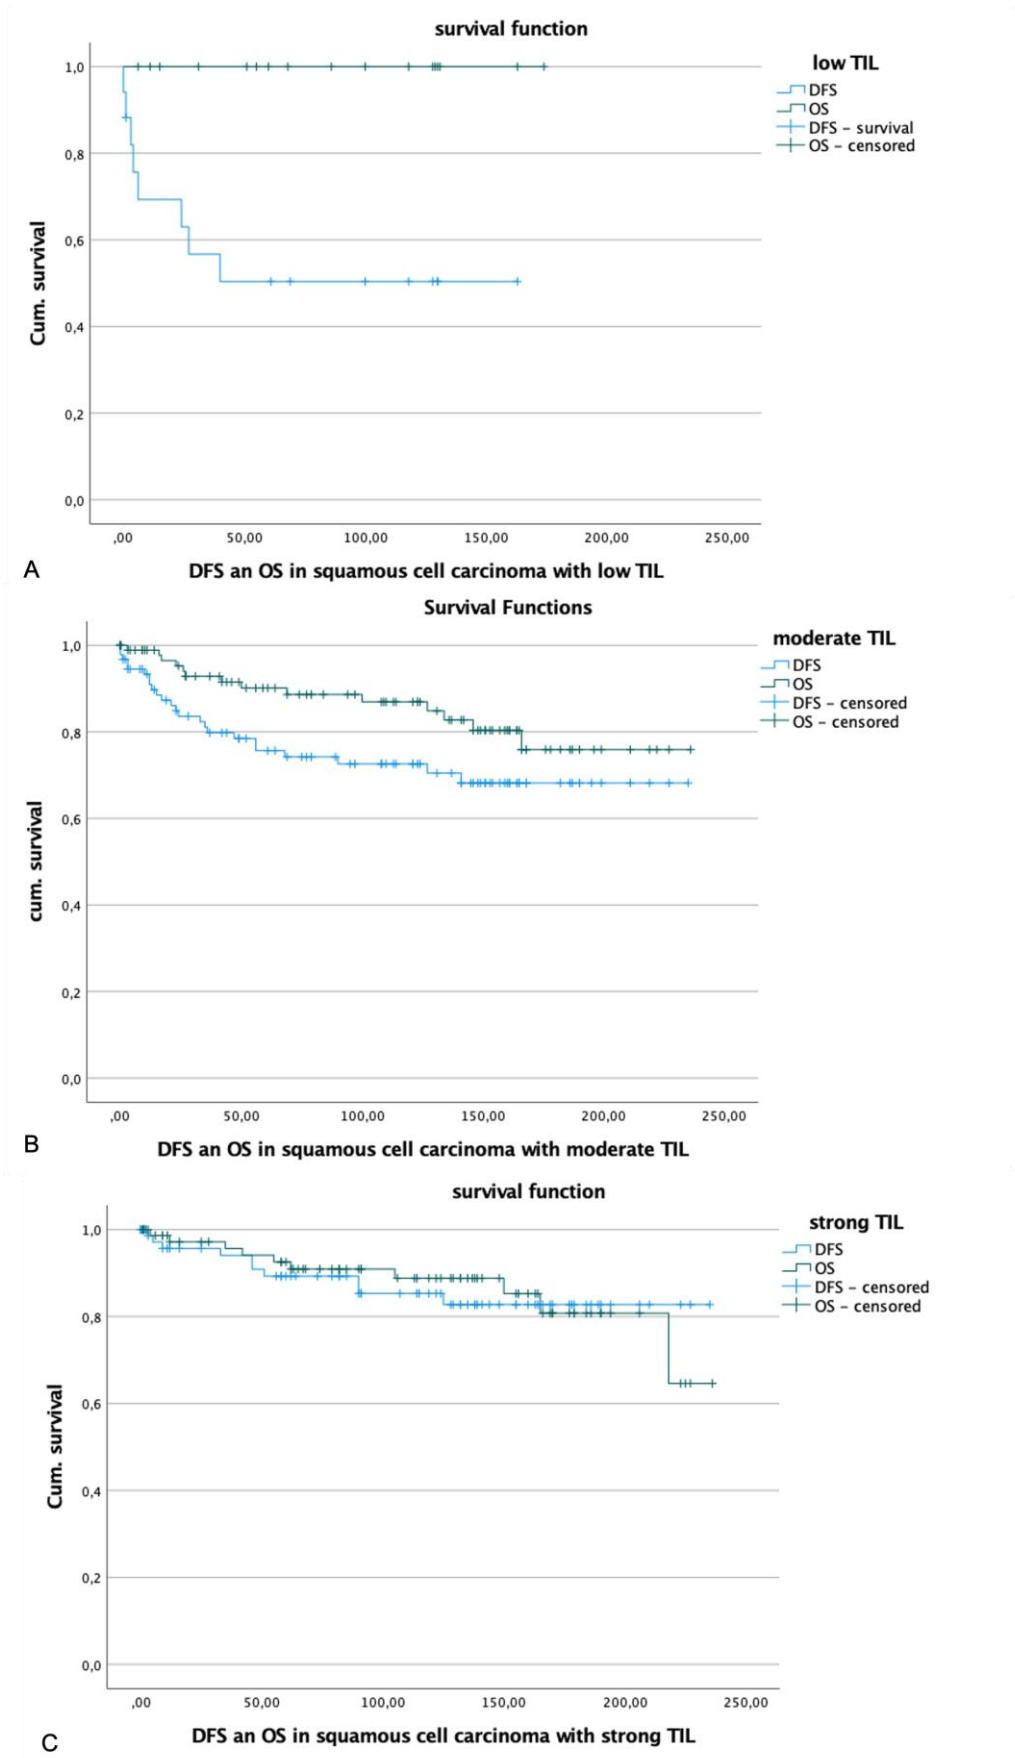

Supplementary Figure 2 A S1: Kaplan-Meier survival analyses for disease free survival (DFS) and OS according to low immune

|                                                                                                                  |    |
|------------------------------------------------------------------------------------------------------------------|----|
| infiltration (A), moderate infiltration (B) or strong infiltration (C) in squamous cell cervical carcinoma cases | 27 |
|                                                                                                                  | 28 |
|                                                                                                                  | 29 |
